# Supplementary material for: Misinformation About COVID-19 Vaccines on Social Media: Rapid Review
Source: PubMed Central journal article supplement (PMC9359307; doi:10.2196/37367), 2022-08-04
Supplement: jmir_v24i8e37367_app2.pdf [file jmir_v24i8e37367_app2.pdf]

## Multimedia Appendix 2. Thematic Analysis

| Theme               | Codes                                                                                                                                                                                                                                | Data Extracts                                                                                                                                                                                                                                                                                                                                                                                                                                                                                                                                                                                                                                                                                                                                                                                                                                                                                                                                                                                                                                                                                                                                                                                                                                                                                                                                                                                       |
|---------------------|--------------------------------------------------------------------------------------------------------------------------------------------------------------------------------------------------------------------------------------|-----------------------------------------------------------------------------------------------------------------------------------------------------------------------------------------------------------------------------------------------------------------------------------------------------------------------------------------------------------------------------------------------------------------------------------------------------------------------------------------------------------------------------------------------------------------------------------------------------------------------------------------------------------------------------------------------------------------------------------------------------------------------------------------------------------------------------------------------------------------------------------------------------------------------------------------------------------------------------------------------------------------------------------------------------------------------------------------------------------------------------------------------------------------------------------------------------------------------------------------------------------------------------------------------------------------------------------------------------------------------------------------------------|
| Conspiracies        | <ul style="list-style-type: none"> <li>• Technology-related</li> <li>• Secret society</li> <li>• Hidden power structures</li> <li>• Secret research</li> <li>• Racism</li> <li>• Corrupt elites</li> <li>• The Deep State</li> </ul> | <ul style="list-style-type: none"> <li>• COVID-19 vaccination is a cover for a plan devised by Bill Gates to implant trackable microchips to control people</li> <li>• COVID-19 vaccines contain a microchip through which biometric data could be collected, and large businesses could send signals to the chips using 5G networks</li> <li>• Part of a new world order to control future populations</li> <li>• The pharmaceutical industries lobbies to kill the elderly and leave the young with Bell’s syndrome</li> <li>• Bill Gates and Anthony Fauci had instigated measures (i.e., microchips and enzymes in the vaccine) to control the population through the administration of the COVID-19 vaccine</li> <li>• The vaccines are created for the profit of pharmaceutical companies</li> <li>• COVID-19 is man-made to enforce vaccination</li> <li>• Race extermination conspiracy that claims that the vaccine was created to kill off [people of color] POC.</li> <li>• “Mark of the beast” reference to the New Testament, i.e. those getting the vaccine will be followers of Satan.</li> <li>• Governments and certain powerful individuals “planned” this health crisis to vaccinate children without parental consent as part of the new world order to control future populations</li> <li>• Evangelical hubs posted conspiracy theories about Bill Gates and China</li> </ul> |
| Theme               | Codes                                                                                                                                                                                                                                | Data Extracts                                                                                                                                                                                                                                                                                                                                                                                                                                                                                                                                                                                                                                                                                                                                                                                                                                                                                                                                                                                                                                                                                                                                                                                                                                                                                                                                                                                       |
| Vaccine Development | <ul style="list-style-type: none"> <li>• Research/procedural scepticism</li> <li>• Content of vaccines</li> <li>• Vaccine hoax</li> </ul>                                                                                            | <ul style="list-style-type: none"> <li>• Crucial trials in the vaccine development were skipped</li> <li>• The vaccine contains pigs</li> <li>• The vaccine contains aborted children</li> <li>• The vaccine has existed before the COVID-19 epidemic</li> <li>• Contains poison</li> <li>• COVID-19 vaccines are poison and the mRNA technology has not been tested yet and is harmful</li> </ul>                                                                                                                                                                                                                                                                                                                                                                                                                                                                                                                                                                                                                                                                                                                                                                                                                                                                                                                                                                                                  |

| Theme                         | Codes                                                                                                                                             | Data Extracts                                                                                                                                                                                                                                                                                                                                                                                                                                                                                                                                                                                                                                                                                                              |
|-------------------------------|---------------------------------------------------------------------------------------------------------------------------------------------------|----------------------------------------------------------------------------------------------------------------------------------------------------------------------------------------------------------------------------------------------------------------------------------------------------------------------------------------------------------------------------------------------------------------------------------------------------------------------------------------------------------------------------------------------------------------------------------------------------------------------------------------------------------------------------------------------------------------------------|
| <p>Medical Misinformation</p> | <ul style="list-style-type: none"> <li>• The harms the vaccines can do to your body and mental health.</li> <li>• Vaccine side-effects</li> </ul> | <ul style="list-style-type: none"> <li>• The vaccine may lead to infertility</li> <li>• Cause chronic illness</li> <li>• Change DNA</li> <li>• Adverse effects leading to genocide</li> <li>• Can cause physical deformities</li> <li>• Can give mental illness</li> <li>• The immune system is stronger than the vaccines</li> <li>• The vaccines are poisonous</li> <li>• The daughter of the Russian president had died after receiving the second dose of the COVID-19 vaccine</li> <li>• Children and soldiers dying after receiving the vaccine in multiple countries</li> <li>• MRNA can do/mean literally anything from protecting you from COVID to sterilization all the way into making you autistic</li> </ul> |
