# Supplementary material for: Misinformation About COVID-19 Vaccines on Social Media: Rapid Review
Source: PubMed Central journal article supplement (PMC9359307; doi:10.2196/37367), 2022-08-04
Supplement: jmir_v24i8e37367_app3.pdf [file jmir_v24i8e37367_app3.pdf]

**Multimedia Appendix 3. Assessment of Risk of Bias. The Joanna Briggs Institute (JBI) Critical Appraisal tool. Checklist for Analytical Cross-Sectional Studies**

| Studies                              | Were the criteria for inclusion in the sample clearly defined? | Were the study subjects and the setting described in detail? | Was the exposure measured in a valid and reliable way? | Were objective, standard criteria used for measurement of the condition? | Were confounding factors identified? | Were strategies to deal with confounding factors stated? | Were the outcomes measured in a valid and reliable way? | Was appropriate statistical analysis used? | Total number of yes %* | Risk of Bias** |
|--------------------------------------|----------------------------------------------------------------|--------------------------------------------------------------|--------------------------------------------------------|--------------------------------------------------------------------------|--------------------------------------|----------------------------------------------------------|---------------------------------------------------------|--------------------------------------------|------------------------|----------------|
| Alibrahim & Awad <sup>1</sup>        | Yes                                                            | Yes                                                          | Yes                                                    | NA                                                                       | Yes                                  | Yes                                                      | Yes                                                     | Yes                                        | 100 %                  | Low            |
| Alliheibi <sup>2</sup>               | NA                                                             | NA                                                           | NA                                                     | NA                                                                       | No                                   | No                                                       | Yes                                                     | NA                                         | 33 %                   | High           |
| Allington et al <sup>3</sup>         | Yes                                                            | Yes                                                          | Yes                                                    | NA                                                                       | Yes                                  | Yes                                                      | Yes                                                     | Yes                                        | 100 %                  | Low            |
| Aloweidi et al <sup>4</sup>          | Yes                                                            | Yes                                                          | Yes                                                    | NA                                                                       | Yes                                  | Yes                                                      | Yes                                                     | Yes                                        | 100 %                  | Low            |
| Baines et al <sup>5</sup>            | NA                                                             | NA                                                           | NA                                                     | NA                                                                       | No                                   | No                                                       | Yes                                                     | NA                                         | 33 %                   | High           |
| Basch et al <sup>6</sup>             | NA                                                             | NA                                                           | NA                                                     | NA                                                                       | No                                   | No                                                       | Yes                                                     | NA                                         | 33 %                   | High           |
| Berry et al <sup>7</sup>             | Yes                                                            | No                                                           | Yes                                                    | NA                                                                       | No                                   | No                                                       | Yes                                                     | NA                                         | 50 %                   | Moderate       |
| Bhagianadh & Arora <sup>8</sup>      | Yes                                                            | Yes                                                          | Yes                                                    | NA                                                                       | Yes                                  | Yes                                                      | Yes                                                     | Yes                                        | 100 %                  | Low            |
| Boucher et al <sup>9</sup>           | NA                                                             | NA                                                           | NA                                                     | NA                                                                       | No                                   | No                                                       | Yes                                                     | NA                                         | 33 %                   | High           |
| Brodziak et al <sup>10</sup>         | Yes                                                            | Yes                                                          | Yes                                                    | NA                                                                       | Yes                                  | Yes                                                      | Yes                                                     | Yes                                        | 100 %                  | Low            |
| Chadwick et al <sup>11</sup>         | Yes                                                            | Yes                                                          | Yes                                                    | NA                                                                       | Yes                                  | Yes                                                      | Yes                                                     | Yes                                        | 100 %                  | Low            |
| Chan et al <sup>12</sup>             | NA                                                             | NA                                                           | NA                                                     | NA                                                                       | Yes                                  | Yes                                                      | Yes                                                     | Yes                                        | 100 %                  | Low            |
| Choudhary et al <sup>13</sup>        | No                                                             | Yes                                                          | NA                                                     | NA                                                                       | NA                                   | NA                                                       | NA                                                      | Yes                                        | 67 %                   | Moderate       |
| Costantino et al <sup>14</sup>       | Yes                                                            | Yes                                                          | Yes                                                    | NA                                                                       | No                                   | No                                                       | Yes                                                     | Yes                                        | 71 %                   | Low            |
| Chriss et al <sup>15</sup>           | NA                                                             | NA                                                           | NA                                                     | NA                                                                       | No                                   | No                                                       | Yes                                                     | NA                                         | 33 %                   | High           |
| Doyno et al <sup>16</sup>            | NA                                                             | NA                                                           | NA                                                     | NA                                                                       | NA                                   | NA                                                       | NA                                                      | NA                                         | 0                      | NA             |
| Ebrahimi et al <sup>17</sup>         | Yes                                                            | Yes                                                          | Yes                                                    | NA                                                                       | Yes                                  | Yes                                                      | Yes                                                     | Yes                                        | 100 %                  | Low            |
| El-Far Cardo et al <sup>18</sup>     | Yes                                                            | Yes                                                          | Yes                                                    | NA                                                                       | No                                   | No                                                       | Yes                                                     | No                                         | 57 %                   | Moderate       |
| Guntuku et al <sup>19</sup>          | NA                                                             | NA                                                           | NA                                                     | NA                                                                       | No                                   | No                                                       | Yes                                                     | Yes                                        | 50 %                   | Moderate       |
| Hernández-García et al <sup>20</sup> | NA                                                             | NA                                                           | NA                                                     | NA                                                                       | No                                   | No                                                       | Yes                                                     | Yes                                        | 50 %                   | Moderate       |
| Herrera-Peco et al <sup>21</sup>     | NA                                                             | NA                                                           | NA                                                     | NA                                                                       | No                                   | No                                                       | Yes                                                     | NA                                         | 33 %                   | High           |
| Herrera-Peco et al <sup>22</sup>     | Yes                                                            | NA                                                           | NA                                                     | NA                                                                       | NA                                   | NA                                                       | Yes                                                     | Yes                                        | 100 %                  | Low            |
| Hughes et al <sup>23</sup>           | Yes                                                            | NA                                                           | NA                                                     | NA                                                                       | NA                                   | NA                                                       | Yes                                                     | NA                                         | 100 %                  | Low            |
| Islam et al <sup>24</sup>            | NA                                                             | NA                                                           | NA                                                     | NA                                                                       | No                                   | No                                                       | Yes                                                     | Yes                                        | 50 %                   | Moderate       |
| Jennings et al <sup>25</sup>         | Yes                                                            | Yes                                                          | Yes                                                    | NA                                                                       | Yes                                  | Yes                                                      | Yes                                                     | No                                         | 86 %                   | Low            |
| Kanyike et al <sup>26</sup>          | Yes                                                            | Yes                                                          | Yes                                                    | NA                                                                       | Yes                                  | Yes                                                      | Yes                                                     | Yes                                        | 100 %                  | Low            |
| Karabela et al <sup>27</sup>         | Yes                                                            | Yes                                                          | Yes                                                    | NA                                                                       | Yes                                  | Yes                                                      | Yes                                                     | Yes                                        | 100 %                  | Low            |

|                                     |     |     |     |    |     |     |     |     |       |          |
|-------------------------------------|-----|-----|-----|----|-----|-----|-----|-----|-------|----------|
| Knights et al <sup>28</sup>         | Yes | Yes | Yes | NA | No  | No  | Yes | NA  | 67 %  | Moderate |
| Kwok et al <sup>29</sup>            | NA  | NA  | NA  | NA | No  | No  | Yes | Yes | 50 %  | Moderate |
| Larrondo-Ureta <sup>30</sup>        | Yes | Yes | NA  | NA | NA  | NA  | NA  | Yes | 100 % | Low      |
| Liu & Liu <sup>31</sup>             | NA  | NA  | NA  | NA | NA  | NA  | Yes | Yes | 100 % | Low      |
| Melton et al <sup>32</sup>          | No  | No  | NA  | NA | No  | No  | Yes | Yes | 33 %  | High     |
| Park et al <sup>33</sup>            | Yes | Yes | Yes | NA | Yes | Yes | Yes | Yes | 100 % | Low      |
| Pascual-Ferra <sup>34</sup>         | NA  | NA  | NA  | NA | No  | No  | No  | Yes | 25 %  | High     |
| Petravic et al <sup>35</sup>        | Yes | Yes | Yes | NA | Yes | Yes | Yes | Yes | 100 % | Low      |
| Rotolo et al <sup>36</sup>          | NA  | NA  | NA  | NA | No  | No  | Yes | NA  | 33 %  | High     |
| Sallam et al <sup>37</sup>          | Yes | Yes | Yes | NA | Yes | Yes | Yes | Yes | 100 % | Low      |
| Sallam et al <sup>38</sup>          | Yes | Yes | Yes | NA | Yes | Yes | Yes | Yes | 100 % | Low      |
| Savolainen <sup>39</sup>            | NA  | NA  | NA  | NA | No  | No  | Yes | No  | 25 %  | High     |
| Sharevski & Gover <sup>40</sup>     | Yes | Yes | Yes | NA | Yes | Yes | Yes | Yes | 100 % | Low      |
| Sobkowicz & Sobkowicz <sup>41</sup> | NA  | NA  | NA  | NA | No  | Yes | Yes | Yes | 75 %  | Low      |
| Thelwall et al <sup>42</sup>        | NA  | NA  | NA  | NA | No  | No  | No  | Yes | 25 %  | High     |
| Wawrzuta et al <sup>43</sup>        | NA  | NA  | NA  | NA | No  | No  | Yes | NA  | 33 %  | High     |
| Zhang et al <sup>44</sup>           | Yes | Yes | Yes | NA | Yes | Yes | Yes | Yes | 100 % | Low      |
| Zhang et al <sup>45</sup>           | Yes | Yes | Yes | NA | Yes | Yes | Yes | Yes | 100 % | Low      |

\*Y=Yes; N= No; NA= Not Applicable

\*\* Low risk of bias > 70%; Moderate risk of bias 40-70%; High risk of bias <40%. The percentage was calculated according to have many “yes” each study got relative to the applicable items.

<sup>1</sup> Alibrahim J, Awad A. COVID-19 vaccine hesitancy among the public in Kuwait: A cross-sectional survey. *Int J Environ* 2021;**18**(16).

<sup>2</sup> Alliheibi FM, Omar A, Al-Horais N. Opinion Mining of Saudi Responses to COVID-19 Vaccines on Twitter: A Computational Linguistic Approach. *Int J Adv Comput Sci Appl* 2021;**12**(6):72-8.

<sup>3</sup> Allington D, McAndrew S, Moxham-Hall V, Duffy B. Coronavirus conspiracy suspicions, general vaccine attitudes, trust and coronavirus information source as predictors of vaccine hesitancy among UK residents during the COVID-19 pandemic. *Psychol Med.* 2021; 1-12.

<sup>4</sup> Aloweidi A, Bsisu I, Suleiman A, Abu-Halaweh S, Almस्ताfa M, Aqel M, et al. Hesitancy towards covid-19 vaccines: An analytical cross-sectional study. *Int J Environ* 2021;**18**(10).

<sup>5</sup> Baines A, Ittefaq M, Abwao M. #Scamdemic, #Plandemic, or #Scaredemic: What Parler Social Media Platform Tells Us about COVID-19 Vaccine. *Vaccines* (Basel). 2021; **9**(5): 421. <https://doi.org/10.3390/vaccines9050421>.

<sup>6</sup> Basch CH, Meleo-Erwin Z, Fera J, Jaime C, Basch CE. A global pandemic in the time of viral memes: COVID-19 vaccine misinformation and disinformation on TikTok. *Hum Vaccin Immunother.* 2021; **17**(8):2373-2377. doi: 10.1080/21645515.2021.1894896.

<sup>7</sup> Berry SD, Johnson KS, Myles L, Herndon L, Montoya A, Fashaw S, et al. Lessons learned from frontline skilled nursing facility staff regarding COVID-19 vaccine hesitancy. *J Am Geriatr Soc* 2021; **69**(5):1140-6.

- 
- <sup>8</sup> Bhagianadh D, Arora K. COVID-19 Vaccine Hesitancy Among Community-Dwelling Older Adults: The Role of Information Sources. *J Appl Gerontol* 2021; **41**(1):4-11. doi: 10.1177/07334648211037507.
- <sup>9</sup> Boucher JC, Cornelson K, Benham JL, Fullerton MM, Tang T, Constantinescu C, et al. Analyzing Social Media to Explore the Attitudes and Behaviors Following the Announcement of Successful COVID-19 Vaccine Trials: Infodemiology Study. *JMIR Infodemiology* 2021;**1**(1):e28800.
- <sup>10</sup> Brodziak A, Sigorski D, Osmola M, et al. Attitudes of Patients with Cancer towards Vaccinations—Results of Online Survey with Special Focus on the Vaccination against COVID-19. *Vaccines*. 2021; **9**(5):411. <https://doi.org/10.3390/vaccines9050411>.
- <sup>11</sup> Chadwick A, Kaiser J, Vaccari C, Freeman D, Lambe S, Loe BS, et al. Online Social Endorsement and Covid-19 Vaccine Hesitancy in the United Kingdom. *Social Media and Society* 2021;**7**(2).
- <sup>12</sup> Chan C, Sounderajah V, Daniels E, Acharya A, Clarke J, Yalamanchili S, et al. The reliability and quality of youtube videos as a source of public health information regarding COVID-19 vaccination: Cross-sectional study. *JMIR Public Health Surveill* 2021;**7**(7).
- <sup>13</sup> Choudhary K, Garapati P, Prasad SR, Murti K, Singh S, Kumar N. COVID-19 vaccine hesitancy assessment among the educated Indian population: An online survey. *Int J Pharm Res*. 2021;**13**(3):1358-63.
- <sup>14</sup> Costantino C, Gori D, Alba D, Cimino L, Conforto A, Tomasello F, et al. Willingness to receive covid-19 vaccination in costumers accessing community pharmacies in the province of Palermo, Italy. *EuroMediterranean Biomed J* 2021;**16**(19):80-4.
- <sup>15</sup> Criss S, Nguyen TT, Norton S, et al. Advocacy, Hesitancy, and Equity: Exploring U.S. Race-Related Discussions of the COVID-19 Vaccine on Twitter. *Int J Environ Res Public Health*. 2021;**18**(11):5693. doi:10.3390/ijerph18115693.
- <sup>16</sup> Doyno CR, Fitzgerald JM, White CM, Sobieraj DM, Zacchera M. (in press). Innovative partnership in Connecticut to expand health professional eligibility to administer COVID-19 vaccines. *Journal of the American Pharmacists Association. J Am Pharm Assoc* 2021.
- <sup>17</sup> Ebrahimi OV, Johnson MS, Ebling S, Amundsen OM, Halsoy O, Hoffart A, et al. Risk, Trust, and Flawed Assumptions: Vaccine Hesitancy During the COVID-19 Pandemic. *Public Health Front*. 2021;**9**: 700213.
- <sup>18</sup> El-Far Cardo A, Kraus T, Kaifie A. Factors That Shape People's Attitudes towards the COVID-19 Pandemic in Germany-The Influence of MEDIA, Politics and Personal Characteristics. *Int J Environ Res Public Health* 2021;**18**(15).
- <sup>19</sup> Guntuku SC, Buttenheim AM, Sherman G, Merchant RM. Twitter discourse reveals geographical and temporal variation in concerns about COVID-19 vaccines in the United States. *Vaccine* 2021; **39**(30):4034-8.
- <sup>20</sup> Hernández-García I, Gascón-Giménez I, Gascón-Giménez A, Giménez-Júlvez T. Information in Spanish on YouTube about Covid-19 vaccines. *Hum Vaccin Immunother* 2021:1-6.
- <sup>21</sup> Herrera-Peco I, Jiménez-Gómez B, Romero Magdalena CS, Deudero JJ, García-Puente M, Benítez De Gracia E, et al. Antivaccine movement and covid-19 negationism: A content analysis of spanish-written messages on twitter. *Vaccines*. 2021;**9**(6).
- <sup>22</sup> Herrera-Peco I, Ruiz Núñez C, Jiménez-Gómez B, Romero-Magdalena CS, Benítez De Gracia E. COVID-19 and vaccination: analysis of public institution's role in information spread through Twitter. *Revista espanola de salud publica* 2021;95.
- <sup>23</sup> Hughes B, Miller-Idriss C, Piltch-Loeb R, Goldberg B, White K, Criezis M, et al. Development of a codebook of online anti-vaccination rhetoric to manage covid-19 vaccine misinformation. *Int J Environ Res* 2021;**18**(14).
- <sup>24</sup> Islam MS, Kamal AM, Kabir A, Southern DL, Khan SH, Hasan SMM, et al. COVID-19 vaccine rumors and conspiracy theories: The need for cognitive inoculation against misinformation to improve vaccine adherence. *PLoS One* 2021;**16**(5):e0251605.
- <sup>25</sup> Jennings W, Stoker G, Bunting H, Valgarðsson VO, Gaskell J, Devine D, et al. Lack of Trust, Conspiracy Beliefs, and Social Media Use Predict COVID-19 Vaccine Hesitancy. *Vaccines (Basel)*. 2021;**9**(6).
- <sup>26</sup> Kanyike AM, Olum R, Kajjimu J, Ojilong D, Akech GM, Nassozi DR, et al. Acceptance of the coronavirus disease-2019 vaccine among medical students in Uganda. *Trop Med Health*. 2021;**49**(1).

- 
- <sup>27</sup> Karabela ŞN, Coşkun F, Hoşgör H. Investigation of the relationships between perceived causes of COVID-19, attitudes towards vaccine and level of trust in information sources from the perspective of Infodemic: the case of Turkey. *BMC Public Health* 2021; **21**(1):1195. doi: 10.1186/s12889-021-11262-1.
- <sup>28</sup> Knights F, Carter J, Deal A, Crawshaw AF, Hayward SE, Jones L, et al. Impact of COVID-19 on migrants' access to primary care and implications for vaccine roll-out: A national qualitative study. *British Journal of General Practice*. 2021;**71**(709):E583-E95.
- <sup>29</sup> Kwok SWH, Vadde SK, Wang G. Tweet Topics and Sentiments Relating to COVID-19 Vaccination Among Australian Twitter Users: Machine Learning Analysis. *J Med Internet Res* 2021;**23**(5):e26953.
- <sup>30</sup> Larrondo-Ureta A, Fernández SP, Morales-I-gras J. Disinformation, vaccines, and covid-19. Analysis of the infodemic and the digital conversation on twitter. *Revista Latina de Comunicacion Social* 2021; **79**:1-18.
- <sup>31</sup> Liu S, Liu J. Understanding Behavioral Intentions Toward COVID-19 Vaccines: Theory-Based Content Analysis of Tweets. *J Med Internet Res* 2021;**23**(5):e28118.
- <sup>32</sup> Melton CA, Olusanya OA, Ammar N, Shaban-Nejad A. Public sentiment analysis and topic modeling regarding COVID-19 vaccines on the Reddit social media platform: A call to action for strengthening vaccine confidence. *J Infect Public Health* 2021;**14**(10):1505-1512. doi:10.1016/j.jiph.2021.08.010.
- <sup>33</sup> Park S, Massey PM, Stimpson JP. Primary Source of Information About COVID-19 as a Determinant of Perception of COVID-19 Severity and Vaccine Uptake: Source of Information and COVID-19. *J Gen Intern Med* 2021; 1-8.
- <sup>34</sup> Pascual-Ferrá P, Alperstein N, Barnett DJ. A Multi-platform Approach to Monitoring Negative Dominance for COVID-19 Vaccine-Related Information Online [published online ahead of print, 2021 May 3]. *Disaster Med Public Health Prep*. 2021;1-24. doi:10.1017/dmp.2021.136.
- <sup>35</sup> Petravić L, Arh R, Gabrovec T, et al. Factors Affecting Attitudes towards COVID-19 Vaccination: An Online Survey in Slovenia. *Vaccines* 2021; **9**(3):247. doi: 10.3390/vaccines9030247.
- <sup>36</sup> Rotolo SM, Jain S, Dhaon S, Dokhanchi JK, Kalata E, Shah T, et al. (in press). A coordinated strategy to develop and distribute infographics addressing COVID-19 vaccine hesitancy and misinformation. *J Am Pharm Assoc (2003)* 2021.
- <sup>37</sup> Sallam M, Dababseh D, Eid H, Hasan H, Taim D, Al-Mahzoum K, et al. Low COVID-19 Vaccine Acceptance Is Correlated with Conspiracy Beliefs among University Students in Jordan. *Int J Environ Res Public Health* 2021;**18**(5).
- <sup>38</sup> Sallam M, Dababseh D, Eid H, et al. High Rates of COVID-19 Vaccine Hesitancy and Its Association with Conspiracy Beliefs: A Study in Jordan and Kuwait among Other Arab Countries. *Vaccines (Basel)*. 2021;**9**(1):42. Published 2021 Jan 12. doi:10.3390/vaccines9010042.
- <sup>39</sup> Savolainen R. Assessing the credibility of COVID-19 vaccine mis/disinformation in online discussion. *Journal of Information Science* 2021. doi:[10.1177/01655515211040653](https://doi.org/10.1177/01655515211040653).
- <sup>40</sup> Sharevski F, Gover D. Two Truths and a Lie: Exploring Soft Moderation of COVID-19 Misinformation with Amazon Alexa. In The 16th International Conference on Availability, Reliability and Security (ARES 2021). Association for Computing Machinery, New York, NY, USA, Article 79, 1–9. DOI:<https://doi.org/10.1145/3465481.3470017>.
- <sup>41</sup> Sobkowicz P, Sobkowicz A. Agent Based Model of Anti-Vaccination Movements: Simulations and Comparison with Empirical Data. *Vaccines (Basel)* 2021;**9**(8):809. Published 2021 Jul 21. doi:10.3390/vaccines9080809.
- <sup>42</sup> Thelwall M, Kousha K, Thelwall S. Covid-19 vaccine hesitancy on English-language Twitter. *Profesional de la Informacion* 2021;**30**(2). e300212. <https://doi.org/10.3145/epi.2021.mar.12>.
- <sup>43</sup> Wawrzuta D, Jaworski M, Gotlib J, Panczyk M. What arguments against COVID-19 vaccines run on facebook in poland: Content analysis of comments. *Vaccines* 2021;**9**(5).
- <sup>44</sup> Zhang KC, Fang Y, Cao H, Chen H, Hu T, Chen Y, et al. Behavioral intention to receive a COVID-19 vaccination among Chinese factory workers: Cross-sectional online survey. *JMIR* 2021;**23**(3).
- <sup>45</sup> Zhang KC, Fang Y, Cao H, Chen H, Hu T, Chen YQ, et al. Parental acceptability of COVID-19 vaccination for children under the age of 18 years: Cross-sectional online survey. *JMIR Pediatr Parent* 2020;**3**(2).
