# Supplementary material for: Misinformation About COVID-19 Vaccines on Social Media: Rapid Review
Source: PubMed Central journal article supplement (PMC9359307; doi:10.2196/37367), 2022-08-04
Supplement: jmir_v24i8e37367_app4.pdf [file jmir_v24i8e37367_app4.pdf]

**Multimedia Appendix 4. GRADE Scores from the GRADE handbook for grading quality of evidence and strength of recommendations.**

| <b>Studies</b>                       | <b>GRADE Score*</b> | <b>Sampling</b>                          | <b>Bias/limitations discussed</b>          | <b>Study design/method</b>                                                                                                |
|--------------------------------------|---------------------|------------------------------------------|--------------------------------------------|---------------------------------------------------------------------------------------------------------------------------|
| Alibrahim & Awad <sup>1</sup>        | 1                   | Non-random sampling                      | Yes                                        | Observational/survey on vaccine hesitancy                                                                                 |
| Alliheibi <sup>2</sup>               | 1                   | Sample described                         | No                                         | Observational/content analysis of tweets regarding attitudes to vaccination                                               |
| Allington et al <sup>3</sup>         | 2                   | Sample representative                    | Yes                                        | Observational/survey on predictors of vaccine hesitancy                                                                   |
| Aloweidi et al <sup>4</sup>          | 1-2                 | Sampling online/self-selected            | Yes                                        | Observational/survey on vaccine hesitancy                                                                                 |
| Baines et al <sup>5</sup>            | 2                   | Random sample                            | Yes                                        | Observational/text analysis of Parler content                                                                             |
| Basch et al <sup>6</sup>             | 2                   | Sampling based on numbers                | Yes                                        | Observational/analysis of popular YouTube videos on vaccines                                                              |
| Berry et al <sup>7</sup>             | 1                   | Non-random sample                        | No                                         | Observational/group interviews on vaccine concerns                                                                        |
| Bhagianadh & Arora <sup>8</sup>      | 2                   | Sample well described                    | Yes                                        | Observational/survey on information sources                                                                               |
| Boucher et al <sup>9</sup>           | 2                   | Sample described                         | Yes                                        | Observational/content analysis of tweets by machine learning                                                              |
| Brodziak et al <sup>10</sup>         | 1-2                 | Sample non-random (?)                    | Briefly discussed                          | Observational/survey on opinions on vaccination                                                                           |
| Chadwick et al <sup>11</sup>         | 2                   | Representative sample                    | Yes                                        | Observational/survey 'media diets'                                                                                        |
| Chan et al <sup>12</sup>             | 2                   | Sampling acceptably described            | Yes                                        | Observational, content analysis of YouTube videos                                                                         |
| Choudhary et al <sup>13</sup>        | 1                   | Non-random/online sampling               | No                                         | Observational/survey                                                                                                      |
| Costantino et al <sup>14</sup>       | 1                   | Non-random (self-selected)               | Briefly discussed                          | Observational/survey                                                                                                      |
| Chriss et al <sup>15</sup>           | 1                   | Sample described                         | Yes                                        | Observational/content analysis of tweets                                                                                  |
| Doyno et al <sup>16</sup>            | 1                   | Sample described<br>No control group     | No                                         | Interventional study/description of a training program and videos used to train vaccinators                               |
| Ebrahimi et al <sup>17</sup>         | 1-2                 | Sample non-random/self-selected          | Yes                                        | Observational/survey on vaccine hesitancy                                                                                 |
| El-Far Cardo et al <sup>18</sup>     | 1-2                 | Sample non-random (online/self-selected) | Yes                                        | Observational/survey                                                                                                      |
| Guntuku et al <sup>19</sup>          | 1-2                 | Sample described                         | Yes, briefly                               | Observational/content analysis of tweets on vaccines                                                                      |
| Hernández-García et al <sup>20</sup> | 2                   | Sample described                         | Yes                                        | Observational/content analysis of YouTube videos on vaccines                                                              |
| Herrera-Peco et al <sup>21</sup>     | 1-2                 | Sample described                         | Yes                                        | Observational/content analysis of antivax tweets                                                                          |
| Herrera-Peco et al <sup>22</sup>     | 1-2                 | Sample described                         | Yes                                        | Observational/content analysis of tweets from institutions                                                                |
| Hughes et al <sup>23</sup>           | 1-2                 | Non-random/purposive sampling            | Bias/limitations discussed                 | Observational/qualitative content analysis of antivax rhetoric on social media/film<br>Sentiment/'code book' of rhetorics |
| Islam et al <sup>24</sup>            | 1                   | Unclear sampling                         | Bias poorly discussed.<br>Poorly conducted | Google, social media/observational                                                                                        |
| Jennings et al <sup>25</sup>         | 2                   | Sample well defined                      | Yes                                        | Survey/observational                                                                                                      |
| Kanyike et al <sup>26</sup>          | 1                   | Non-random sample (self-selected)        | Yes, briefly                               | Observational/survey                                                                                                      |
| Karabela et al <sup>27</sup>         | 1                   | Sample non-random (self-recruited)       | No                                         | Observational/survey                                                                                                      |
| Knights et al <sup>28</sup>          | 1-2                 | Non-random sampling                      | Yes                                        | Observational study                                                                                                       |
| Kwok et al <sup>29</sup>             | 2                   | Sample described                         | Yes                                        | Observational study of tweets                                                                                             |
| Larrondo-Ureta <sup>30</sup>         | 1                   | Sample described                         | Bias/limitations poorly discussed          | Observational Qualitative content analysis of tweets                                                                      |
| Liu & Liu <sup>31</sup>              | 2                   | Sampling described well                  | Yes                                        | Observational Qualitative content analysis of Twitter posts                                                               |

|                                     |     |                                                                  |                       |                                                           |
|-------------------------------------|-----|------------------------------------------------------------------|-----------------------|-----------------------------------------------------------|
| Melton et al <sup>32</sup>          | 1-2 | Unclear sampling                                                 | Yes                   | Observational/sentiment analysis of Reddit posts          |
| Park et al <sup>33</sup>            | 2   | Sampling clear                                                   | Yes                   | Observational/survey                                      |
| Pascual-Ferra <sup>34</sup>         | 1   | Unclear design                                                   | Yes                   | Observational/social media trends vs. 'adverse events'    |
| Petravic et al <sup>35</sup>        | 1-2 | Unclear sampling/online                                          | Yes                   | Observational/survey                                      |
| Rotolo et al <sup>36</sup>          | 2-3 | Infographics created and spread on social media, reach evaluated | Yes                   | Intervention study, no randomization                      |
| Sallam et al <sup>37</sup>          | 1-2 | Online/unclear sampling                                          | Yes                   | Observational/survey                                      |
| Sallam et al <sup>38</sup>          | 1-2 | Online/unclear sampling                                          | Yes                   | Observational/survey                                      |
| Savolainen <sup>39</sup>            | 1   | Unclear sampling                                                 | No                    | Observational study of Reddit posts                       |
| Sharevski & Gover <sup>40</sup>     | 3   | Clear sampling but self selected (online)                        | Yes                   | Intervention study with randomization                     |
| Sobkowicz & Sobkowicz <sup>41</sup> | 2   | Clear sampling                                                   | Yes                   | Social media/observational                                |
| Thelwall et al <sup>42</sup>        | 1   | Clear sampling                                                   | Bias poorly discussed | Twitter/observational                                     |
| Wawrzuta et al <sup>43</sup>        | 1   | Sampling unclear                                                 | No                    | Observational/content analysis of Facebook posts/comments |
| Zhang et al <sup>44</sup>           | 2   | Sampling described                                               | Yes                   | Observational/online survey of attitudes to vaccination   |
| Zhang et al <sup>45</sup>           | 2   | Sampling described                                               | Yes                   | Observational/online survey of attitudes to vaccination   |

\*GRADE Scores: 1=very low, 2=low, 3=moderate, 4=high

## References

- 1 Albrahim J, Awad A. COVID-19 vaccine hesitancy among the public in Kuwait: A cross-sectional survey. *Int J Environ* 2021;**18**(16).
- 2 Alliheibi FM, Omar A, Al-Horais N. Opinion Mining of Saudi Responses to COVID-19 Vaccines on Twitter: A Computational Linguistic Approach. *Int J Adv Comput Sci Appl* 2021;**12**(6):72-8.
- 3 Allington D, McAndrew S, Moxham-Hall V, Duffy B. Coronavirus conspiracy suspicions, general vaccine attitudes, trust and coronavirus information source as predictors of vaccine hesitancy among UK residents during the COVID-19 pandemic. *Psychol Med.* 2021; 1-12.
- 4 Aloweidi A, Bsisu I, Suleiman A, Abu-Halaweh S, Almustafa M, Aqel M, et al. Hesitancy towards covid-19 vaccines: An analytical cross-sectional study. *Int J Environ* 2021;**18**(10).
- 5 Baines A, Ittefaq M, Abwao M. #Scamdemic, #Plandemic, or #Scaredemic: What Parler Social Media Platform Tells Us about COVID-19 Vaccine. *Vaccines* (Basel). 2021; **9**(5): 421. <https://doi.org/10.3390/vaccines9050421>.
- 6 Basch CH, Meleo-Erwin Z, Fera J, Jaime C, Basch CE. A global pandemic in the time of viral memes: COVID-19 vaccine misinformation and disinformation on TikTok. *Hum Vaccin Immunother.* 2021; **17**(8):2373-2377. doi: 10.1080/21645515.2021.1894896.
- 7 Berry SD, Johnson KS, Myles L, Herndon L, Montoya A, Fashaw S, et al. Lessons learned from frontline skilled nursing facility staff regarding COVID-19 vaccine hesitancy. *J Am Geriatr Soc* 2021; **69**(5):1140-6.
- 8 Bhagianadh D, Arora K. COVID-19 Vaccine Hesitancy Among Community-Dwelling Older Adults: The Role of Information Sources. *J Appl Gerontol* 2021; **41**(1):4-11. doi: 10.1177/07334648211037507.
- 9 Boucher JC, Cornelson K, Benham JL, Fullerton MM, Tang T, Constantinescu C, et al. Analyzing Social Media to Explore the Attitudes and Behaviors Following the Announcement of Successful COVID-19 Vaccine Trials: Infodemiology Study. *JMIR Infodemiology* 2021;**1**(1):e28800.
- 10 Brodziak A, Sigorski D, Osmola M, et al. Attitudes of Patients with Cancer towards Vaccinations—Results of Online Survey with Special Focus on the Vaccination against COVID-19. *Vaccines.* 2021; **9**(5):411. <https://doi.org/10.3390/vaccines9050411>.

- 
- <sup>11</sup> Chadwick A, Kaiser J, Vaccari C, Freeman D, Lambe S, Loe BS, et al. Online Social Endorsement and Covid-19 Vaccine Hesitancy in the United Kingdom. *Social Media and Society* 2021;**7**(2).
- <sup>12</sup> Chan C, Sounderajah V, Daniels E, Acharya A, Clarke J, Yalamanchili S, et al. The reliability and quality of youtube videos as a source of public health information regarding COVID-19 vaccination: Cross-sectional study. *JMIR Public Health Surveill* 2021;**7**(7).
- <sup>13</sup> Choudhary K, Garapati P, Prasad SR, Murti K, Singh S, Kumar N. COVID-19 vaccine hesitancy assessment among the educated Indian population: An online survey. *Int J Pharm Res.* 2021;**13**(3):1358-63.
- <sup>14</sup> Costantino C, Gori D, Alba D, Cimino L, Conforto A, Tomasello F, et al. Willingness to receive covid-19 vaccination in costumers accessing community pharmacies in the province of Palermo, Italy. *EuroMediterranean Biomed J* 2021;**16**(19):80-4.
- <sup>15</sup> Criss S, Nguyen TT, Norton S, et al. Advocacy, Hesitancy, and Equity: Exploring U.S. Race-Related Discussions of the COVID-19 Vaccine on Twitter. *Int J Environ Res Public Health.* 2021;**18**(11):5693. doi:10.3390/ijerph18115693.
- <sup>16</sup> Doyno CR, Fitzgerald JM, White CM, Sobieraj DM, Zacchera M. (in press). Innovative partnership in Connecticut to expand health professional eligibility to administer COVID-19 vaccines. *Journal of the American Pharmacists Association. J Am Pharm Assoc* 2021.
- <sup>17</sup> Ebrahimi OV, Johnson MS, Ebling S, Amundsen OM, Halsoy O, Hoffart A, et al. Risk, Trust, and Flawed Assumptions: Vaccine Hesitancy During the COVID-19 Pandemic. *Public Health Front.* 2021;**9**:700213.
- <sup>18</sup> El-Far Cardo A, Kraus T, Kaifie A. Factors That Shape People's Attitudes towards the COVID-19 Pandemic in Germany-The Influence of MEDIA, Politics and Personal Characteristics. *Int J Environ Res Public Health* 2021;**18**(15).
- <sup>19</sup> Guntuku SC, Buttenheim AM, Sherman G, Merchant RM. Twitter discourse reveals geographical and temporal variation in concerns about COVID-19 vaccines in the United States. *Vaccine* 2021; **39**(30):4034-8.
- <sup>20</sup> Hernández-García I, Gascón-Giménez I, Gascón-Giménez A, Giménez-Júlvez T. Information in Spanish on YouTube about Covid-19 vaccines. *Hum Vaccin Immunother* 2021:1-6.
- <sup>21</sup> Herrera-Peco I, Jiménez-Gómez B, Romero Magdalena CS, Deudero JJ, García-Puente M, Benítez De Gracia E, et al. Antivaccine movement and covid-19 negationism: A content analysis of spanish-written messages on twitter. *Vaccines.* 2021;**9**(6).
- <sup>22</sup> Herrera-Peco I, Ruiz Núñez C, Jiménez-Gómez B, Romero-Magdalena CS, Benítez De Gracia E. COVID-19 and vaccination: analysis of public institution's role in information spread through Twitter. *Revista espanola de salud publica* 2021;95.
- <sup>23</sup> Hughes B, Miller-Idriss C, Piltch-Loeb R, Goldberg B, White K, Criezis M, et al. Development of a codebook of online anti-vaccination rhetoric to manage covid-19 vaccine misinformation. *Int J Environ Res* 2021;**18**(14).
- <sup>24</sup> Islam MS, Kamal AM, Kabir A, Southern DL, Khan SH, Hasan SMM, et al. COVID-19 vaccine rumors and conspiracy theories: The need for cognitive inoculation against misinformation to improve vaccine adherence. *PLoS One* 2021;**16**(5):e0251605.
- <sup>25</sup> Jennings W, Stoker G, Bunting H, Valgarðsson VO, Gaskell J, Devine D, et al. Lack of Trust, Conspiracy Beliefs, and Social Media Use Predict COVID-19 Vaccine Hesitancy. *Vaccines (Basel).* 2021;**9**(6).
- <sup>26</sup> Kanyike AM, Olum R, Kajjimu J, Ojilong D, Akech GM, Nassozi DR, et al. Acceptance of the coronavirus disease-2019 vaccine among medical students in Uganda. *Trop Med Health.* 2021;**49**(1).
- <sup>27</sup> Karabela ŞN, Coşkun F, Hoşgör H. Investigation of the relationships between perceived causes of COVID-19, attitudes towards vaccine and level of trust in information sources from the perspective of Infodemic: the case of Turkey. *BMC Public Health* 2021; **21**(1):1195. doi: 10.1186/s12889-021-11262-1.
- <sup>28</sup> Knights F, Carter J, Deal A, Crawshaw AF, Hayward SE, Jones L, et al. Impact of COVID-19 on migrants' access to primary care and implications for vaccine roll-out: A national qualitative study. *British Journal of General Practice.* 2021;**71**(709):E583-E95.
- <sup>29</sup> Kwok SWH, Vadde SK, Wang G. Tweet Topics and Sentiments Relating to COVID-19 Vaccination Among Australian Twitter Users: Machine Learning Analysis. *J Med Internet Res* 2021;**23**(5):e26953.
- <sup>30</sup> Larrondo-Ureta A, Fernández SP, Morales-I-gras J. Disinformation, vaccines, and covid-19. Analysis of the infodemic and the digital conversation on twitter. *Revista Latina de Comunicacion Social* 2021; **79**:1-18.
- <sup>31</sup> Liu S, Liu J. Understanding Behavioral Intentions Toward COVID-19 Vaccines: Theory-Based Content Analysis of Tweets. *J Med Internet Res* 2021;**23**(5):e28118.
- <sup>32</sup> Melton CA, Olusanya OA, Ammar N, Shaban-Nejad A. Public sentiment analysis and topic modeling regarding COVID-19 vaccines on the Reddit social media platform: A call to action for strengthening vaccine confidence. *J Infect Public Health* 2021;**14**(10):1505-1512. doi:10.1016/j.jiph.2021.08.010.

- 
- <sup>33</sup> Park S, Massey PM, Stimpson JP. Primary Source of Information About COVID-19 as a Determinant of Perception of COVID-19 Severity and Vaccine Uptake: Source of Information and COVID-19. *J Gen Intern Med* 2021; 1-8.
- <sup>34</sup> Pascual-Ferrá P, Alperstein N, Barnett DJ. A Multi-platform Approach to Monitoring Negative Dominance for COVID-19 Vaccine-Related Information Online [published online ahead of print, 2021 May 3]. *Disaster Med Public Health Prep.* 2021;1-24. doi:10.1017/dmp.2021.136.
- <sup>35</sup> Petravić L, Arh R, Gabrovec T, et al. Factors Affecting Attitudes towards COVID-19 Vaccination: An Online Survey in Slovenia. *Vaccines* 2021; **9**(3):247. doi: 10.3390/vaccines9030247.
- <sup>36</sup> Rotolo SM, Jain S, Dhaon S, Dokhanchi JK, Kalata E, Shah T, et al. (in press). A coordinated strategy to develop and distribute infographics addressing COVID-19 vaccine hesitancy and misinformation. *J Am Pharm Assoc (2003)* 2021.
- <sup>37</sup> Sallam M, Dababseh D, Eid H, Hasan H, Taim D, Al-Mahzoum K, et al. Low COVID-19 Vaccine Acceptance Is Correlated with Conspiracy Beliefs among University Students in Jordan. *Int J Environ Res Public Health* 2021;**18**(5).
- <sup>38</sup> Sallam M, Dababseh D, Eid H, et al. High Rates of COVID-19 Vaccine Hesitancy and Its Association with Conspiracy Beliefs: A Study in Jordan and Kuwait among Other Arab Countries. *Vaccines (Basel)*. 2021;**9**(1):42. Published 2021 Jan 12. doi:10.3390/vaccines9010042.
- <sup>39</sup> Savolainen R. Assessing the credibility of COVID-19 vaccine mis/disinformation in online discussion. *Journal of Information Science* 2021. doi:[10.1177/01655515211040653](https://doi.org/10.1177/01655515211040653).
- <sup>40</sup> Sharevski F, Gover D. Two Truths and a Lie: Exploring Soft Moderation of COVID-19 Misinformation with Amazon Alexa. In *The 16th International Conference on Availability, Reliability and Security (ARES 2021)*. Association for Computing Machinery, New York, NY, USA, Article 79, 1–9. DOI:<https://doi.org/10.1145/3465481.3470017>.
- <sup>41</sup> Sobkowicz P, Sobkowicz A. Agent Based Model of Anti-Vaccination Movements: Simulations and Comparison with Empirical Data. *Vaccines (Basel)* 2021;**9**(8):809. Published 2021 Jul 21. doi:10.3390/vaccines9080809.
- <sup>42</sup> Thelwall M, Kousha K, Thelwall S. Covid-19 vaccine hesitancy on English-language Twitter. *Profesional de la Informacion* 2021;**30**(2). e300212. <https://doi.org/10.3145/epi.2021.mar.12>.
- <sup>43</sup> Wawrzuta D, Jaworski M, Gotlib J, Panczyk M. What arguments against COVID-19 vaccines run on facebook in poland: Content analysis of comments. *Vaccines* 2021;**9**(5).
- <sup>44</sup> Zhang KC, Fang Y, Cao H, Chen H, Hu T, Chen Y, et al. Behavioral intention to receive a COVID-19 vaccination among Chinese factory workers: Cross-sectional online survey. *JMIR* 2021;**23**(3).
- <sup>45</sup> Zhang KC, Fang Y, Cao H, Chen H, Hu T, Chen YQ, et al. Parental acceptability of COVID-19 vaccination for children under the age of 18 years: Cross-sectional online survey. *JMIR Pediatr Parent* 2020;**3**(2).
