# Supplementary material for: Misinformation About COVID-19 Vaccines on Social Media: Rapid Review
Source: PubMed Central journal article supplement (PMC9359307; doi:10.2196/37367), 2022-08-04
Supplement: jmir_v24i8e37367_app5.pdf [file jmir_v24i8e37367_app5.pdf]

## Multimedia Appendix 5. List of full-text articles excluded, with reasons (n=75)

Not about misinformation: 31

Not about COVID-19 vaccines: 17

Not about social media: 13

Too early in the COVID-19 vaccine development, i.e. not from phase III or IV: 13

Not an empirical study: 1

| Study                                                                                                                                                                                                                                                                          | Reason for exclusion                                                                                                                                     |
|--------------------------------------------------------------------------------------------------------------------------------------------------------------------------------------------------------------------------------------------------------------------------------|----------------------------------------------------------------------------------------------------------------------------------------------------------|
| 1. Abu-Farha R, Mukattash T, Itani R, et al. Willingness of Middle Eastern public to receive COVID-19 vaccines. <i>Saudi Pharm J.</i> 2021; <b>29</b> (7):734-739. doi:10.1016/j.jsps.2021.05.005                                                                              | Not about misinformation                                                                                                                                 |
| 2. Aci OS, Kackin O, Karaaslan S, Ciydem E. Qualitative examination of the attitudes of healthcare workers in Turkey regarding COVID-19 vaccines. <i>Int J Nurs Knowl</i> 2021.                                                                                                | Not about misinformation                                                                                                                                 |
| 3. Al-Marshoudi S, Al-Balushi H, Al-Wahaibi A, et al. Knowledge, Attitudes, and Practices (KAP) toward the COVID-19 Vaccine in Oman: A Pre-Campaign Cross-Sectional Study. <i>Vaccines (Basel).</i> 2021; <b>9</b> (6):602. Published 2021 Jun 4. doi:10.3390/vaccines9060602. | Not about misinformation                                                                                                                                 |
| 4. Aldossari KK, Alharbi MB, Alkahtani SM, Alrowaily TZ, Alshaikhi AM, Twair AA. COVID-19 vaccine hesitancy among patients with diabetes in Saudi Arabia. <i>Diabetes Metab Syndr.</i> 2021; <b>15</b> (5):102271. doi:10.1016/j.dsx.2021.102271                               | Not about misinformation                                                                                                                                 |
| 5. Ali KF, Whitebridge S, Jamal MH, Alsafy M, Atkin SL. Perceptions, Knowledge, and Behaviors Related to COVID-19 Among Social Media Users: Cross-Sectional Study. <i>J Med Internet Res.</i> 2020; <b>22</b> (9):e19913. Published 2020 Sep 8. doi:10.2196/19913              | Not about the COVID-10 vaccine<br>Not about misinformation                                                                                               |
| 6. Basch CE, Basch CH, Hillyer GC, Meleo-Erwin ZC, Zagnit EA<br>YouTube Videos and Informed Decision-Making About COVID-19 Vaccination: Successive Sampling Study. <i>JMIR Public Health Surveill</i> 2021; <b>7</b> (5):e28352                                                | Not about misinformation                                                                                                                                 |
| 7. Basch CH, Hillyer GC, Zagnit EA, Basch CE. YouTube coverage of COVID-19 vaccine development: implications for awareness and uptake. <i>Hum Vaccin Immunother.</i> 2020; <b>16</b> (11):2582-2585. doi:10.1080/21645515.2020.1790280                                         | Too early in the COVID-19 vaccine development.<br><br>From April 6, 2020<br>Too early in the Covid-19 vaccine development, i.e. not from phase III or IV |
| 8. Bendau A, Plag J, Petzold MB, Ströhle A. COVID-19 vaccine hesitancy and related fears and anxiety. <i>Int Immunopharmacol.</i> 2021; <b>97</b> :107724. doi:10.1016/j.intimp.2021.107724                                                                                    | Not about social media                                                                                                                                   |
| 9. Lang R, Benham JL, Atabati O, et al. Attitudes, behaviours and barriers to public health measures for COVID-19: a survey to inform public health messaging. <i>BMC Public Health.</i> 2021; (1):765. DOI: 10.1186/s12889-021-10790-0. PMID: 33882896; PMCID: PMC8058588.    | Not about COVID-19 vaccine or misinformation                                                                                                             |
| 10. Benis A, Seidmann A, Ashkenazi S. Reasons for Taking the COVID-19 Vaccine by US Social Media Users. <i>Vaccines (Basel).</i> 2021; <b>9</b> (4):315. Published 2021 Mar 29. doi:10.3390/vaccines9040315                                                                    | Not about misinformation                                                                                                                                 |
| 11. Berenson AB, Chang M, Hirth JM, Kanukurthy M. Intent to get vaccinated against COVID-19 among reproductive-aged women in Texas. <i>Hum Vaccin Immunother.</i> 2021; <b>17</b> (9):2914-2918. doi:10.1080/21645515.2021.1918994                                             | Not about social media or misinformation                                                                                                                 |
| 12. Chaudhary FA, Ahmad B, Khalid MD, Fazal A, Javaid MM, Butt DQ. Factors influencing COVID-19 vaccine hesitancy and acceptance among the Pakistani population. <i>Hum Vaccin Immunother</i> 2021; <b>17</b> (10):3365-3370. doi:10.1080/21645515.2021.1944743                | Not about misinformation                                                                                                                                 |
| 13. Chen T, Rong J, Yang J, Cong G, Li G. Combining Public Opinion Dissemination with Polarization Process Considering Individual Heterogeneity. <i>Healthcare (Basel).</i> 2021; <b>9</b> (2):176. Published 2021 Feb 7. doi:10.3390/healthcare9020176                        | Not about COVID-19 vaccines.<br>Removed during data extraction. Testing out a theory.                                                                    |

|     |                                                                                                                                                                                                                                                                                                                                                                                                              |                                                                                                                                                       |
|-----|--------------------------------------------------------------------------------------------------------------------------------------------------------------------------------------------------------------------------------------------------------------------------------------------------------------------------------------------------------------------------------------------------------------|-------------------------------------------------------------------------------------------------------------------------------------------------------|
| 14. | Costantini H. COVID-19 Vaccine Literacy of Family Carers for Their Older Parents in Japan. <i>Healthcare (Basel)</i> . 2021;9(8):1038. Published 2021 Aug 12. doi:10.3390/healthcare9081038                                                                                                                                                                                                                  | Not about misinformation                                                                                                                              |
| 15. | Cotfas LA, Delcea C, Roxin I, Ioanăș C, Gherai DS, Tajariol F. The Longest Month: Analyzing COVID-19 Vaccination Opinions Dynamics from Tweets in the Month following the First Vaccine Announcement. <i>IEEE Access</i> 2021;9:33203-23. doi: 10.1109/ACCESS.2021.3059821.                                                                                                                                  | Not about misinformation                                                                                                                              |
| 16. | Di Gennaro F, Murri R, Segala FV, et al. Attitudes towards Anti-SARS-CoV2 Vaccination among Healthcare Workers: Results from a National Survey in Italy. <i>Viruses</i> . 2021;13(3):371. Published 2021 Feb 26. doi:10.3390/v13030371                                                                                                                                                                       | Not about social media or misinformation                                                                                                              |
| 17. | Gbashi S, Adebo OA, Doorsamy W, Njobeh PB Systematic Delineation of Media Polarity on COVID-19 Vaccines in Africa: Computational Linguistic Modeling Study. <i>JMIR Med Inform</i> 2021;9(3):e22916 doi: <a href="https://doi.org/10.2196/22916">10.2196/22916</a>                                                                                                                                           | Not about COVID-19 vaccines or misinformation                                                                                                         |
| 18. | Germani F, Biller-Andorno N. The anti-vaccination infodemic on social media: A behavioral analysis. <i>PLoS One</i> . 2021;16(3):e0247642. Published 2021 Mar 3. doi:10.1371/journal.pone.0247642                                                                                                                                                                                                            | Not about COVID-19 vaccines.<br><br>Removed during data extraction. About anti-vaxx in general.                                                       |
| 19. | Gerts D, Shelley CD, Parikh N, Pitts T, Watson Ross C, Fairchild G, Vaquera Chavez NY, Daughton AR “Thought I’d Share First” and Other Conspiracy Theory Tweets from the COVID-19 Infodemic: Exploratory Study. <i>JMIR Public Health Surveill</i> 2021;7(4):e26527 doi: <a href="https://doi.org/10.2196/26527">10.2196/26527</a>                                                                           | Too early in the COVID-19 vaccine development.<br><br>Removed during data extraction due to the dates they collected data (January to early May 2020) |
| 20. | Gokhale S. "Monitoring the Perception of Covid-19 Vaccine using Topic Models," 2020 <i>IEEE Intl Conf on Parallel &amp; Distributed Processing with Applications, Big Data &amp; Cloud Computing, Sustainable Computing &amp; Communications, Social Computing &amp; Networking (ISPA/BDCLOUD/SocialCom/SustainCom)</i> , 2020, pp. 867-874, doi: 10.1109/ISPA-BDCLOUD-SocialCom-SustainCom51426.2020.00134. | Too early in the COVID-19 vaccine development.<br><br>Removed during data extraction. Tweets harvested on May 20, 2020                                |
| 21. | Greene C. M.& Murphy G. Quantifying the effects of fake news on behavior: Evidence from a study of COVID-19 misinformation. <i>J Exp Psychol Appl</i> 2021. Advance online publication. <a href="https://doi.org/10.1037/xap0000371">https://doi.org/10.1037/xap0000371</a>                                                                                                                                  | Not about social media<br><br>Removed during data extraction.                                                                                         |
| 22. | Grimes DR. Medical disinformation and the unviable nature of COVID-19 conspiracy theories. <i>PLoS ONE</i> 2021; 16(3): e0245900. <a href="https://doi.org/10.1371/journal.pone.0245900">https://doi.org/10.1371/journal.pone.0245900</a>                                                                                                                                                                    | Not about COVID-19 vaccines                                                                                                                           |
| 23. | Harhay MN, Klassen AC, Zaidi H, et al. Living Organ Donor Perspectives and Sources of Hesitancy about COVID-19 Vaccines. <i>Kidney360</i> . 2021;2(7):1132-1140. doi:10.34067/kid.0002112021                                                                                                                                                                                                                 | Not about misinformation                                                                                                                              |
| 24. | Hashemi M. Discovering social media topics and patterns in the coronavirus and election era. <i>J Inf Commun Ethics Soc</i> 2021. ID: covidwho-1360402                                                                                                                                                                                                                                                       | Not about the COVID-19 vaccines                                                                                                                       |
| 25. | Herrera-Peco I, Jiménez-Gómez B, Peña Deudero JJ, Benitez, De Gracia E, Ruiz-Núñez C. Healthcare Professionals' Role in Social Media Public Health Campaigns: Analysis of Spanish Pro Vaccination Campaign on Twitter. <i>Healthcare (Basel)</i> . 2021;9(6):662. Published 2021 Jun 2. doi:10.3390/healthcare9060662                                                                                        | Not about misinformation                                                                                                                              |
| 26. | Hou Z, Tong Y, Du F, et al. Assessing COVID-19 Vaccine Hesitancy, Confidence, and Public Engagement: A Global Social Listening Study. <i>J Med Internet Res</i> . 2021;23(6):e27632. Published 2021 Jun 11. doi:10.2196/27632                                                                                                                                                                                | Too early in the COVID-19 vaccine development.<br><br>Removed during data extraction. The data covered the period from June 13 to July 31, 2020       |
| 27. | Huynh G, Nguyen TV, Nguyen DD, Lam QM, Pham TN, Nguyen HTN. Knowledge About COVID-19, Beliefs and Vaccination Acceptance Against COVID-19 Among High-Risk People in Ho Chi Minh City, Vietnam. <i>Infect Drug Resist</i> . 2021;14:1773-1780. Published 2021 May 13. doi:10.2147/IDR.S308446                                                                                                                 | Not about social media or misinformation                                                                                                              |

|     |                                                                                                                                                                                                                                                                                                                                                                                                                                                                                             |                                                                                                            |
|-----|---------------------------------------------------------------------------------------------------------------------------------------------------------------------------------------------------------------------------------------------------------------------------------------------------------------------------------------------------------------------------------------------------------------------------------------------------------------------------------------------|------------------------------------------------------------------------------------------------------------|
| 28. | Jain J, Saurabh S, Kumar P, et al. COVID-19 vaccine hesitancy among medical students in India. <i>Epidemiol Infect.</i> 2021; <b>149</b> :e132. Published 2021 May 20. doi:10.1017/S0950268821001205                                                                                                                                                                                                                                                                                        | Not about misinformation                                                                                   |
| 29. | Jamison AM, Broniatowski DA, Dredze M, Sangraula A, Smith MC, Quinn SC. Not just conspiracy theories: Vaccine opponents and proponents add to the COVID-19 'infodemic' on Twitter. <i>Harv Kennedy Sch Misinformation Rev.</i> 2020; <b>1</b> :10.37016/mr-2020-38. doi:10.37016/mr-2020-38                                                                                                                                                                                                 | Too early in the COVID-19 vaccine development.<br><br>Examined Tweets from February 2020.                  |
| 30. | Jang H, Rempel E, Roth D, Carenini G, Janjua NZ. Tracking COVID-19 Discourse on Twitter in North America: Infodemiology Study Using Topic Modeling and Aspect-Based Sentiment Analysis. <i>J Med Internet Res.</i> 2021; <b>23</b> (2):e25431. Published 2021 Feb 10. doi:10.2196/25431                                                                                                                                                                                                     | Not about COVID-19 vaccines                                                                                |
| 31. | Janssens U, Kluge S, Marx G, Hermes C, Salzberger B, Karagiannidis C. Einstellung zur Impfung gegen SARS-CoV-2 : Umfrage unter Mitarbeitenden in Krankenhäusern vor und nach Beginn der Impfungen in den deutschen Krankenhäusern [Attitude towards vaccination against SARS-CoV-2 : Survey among employees in hospitals before and after the start of vaccinations in German hospitals]. <i>Med Klin Intensivmed Notfmed.</i> 2021; <b>116</b> (5):421-430. doi:10.1007/s00063-021-00821-4 | Not about social media                                                                                     |
| 32. | Kalichman SC, Eaton LA, Earnshaw VA, Brousseau N. Faster than warp speed: early attention to COVID-19 by anti-vaccine groups on Facebook [published online ahead of print, 2021 Apr 9]. <i>J Public Health (Oxf).</i> 2021;fdab093. doi:10.1093/pubmed/fdab093                                                                                                                                                                                                                              | Too early in the COVID-19 vaccine development.<br><br>Removed during data extraction. Data from March 2020 |
| 33. | Kolapo, A., Ilesanmi, O., Omoju, T., Odukanmi, O., Akanbi, D., Okediran, J., Balogun, M. Knowledge, Perception, and Sources of Information on COVID-19 among Nigerian Youths in the First Month of the Pandemic. <i>Journal of Health Sciences &amp; Surveillance System</i> , 2021; <b>9</b> (2): 89-96. doi: 10.30476/jhsss.2020.88288.1140                                                                                                                                               | Not about COVID-19 vaccines                                                                                |
| 34  | Laurencin CT, Valentine H, Yancy C, Jones CP, Bright C. The COVID-19 Vaccine and the Black Community: Addressing the Justified Questions. <i>J Racial Ethn Health Disparities.</i> 2021; <b>8</b> (4):809-820. doi:10.1007/s40615-021-01082-9                                                                                                                                                                                                                                               | Not about social media.<br><br>Removed during data extraction.                                             |
| 35. | Lee H, Noh EB, Park SJ, Nam HK, Lee TH, Lee GR, Nam EW. COVID-19 Vaccine Perception in South Korea: Web Crawling Approach. <i>JMIR Public Health Surveill</i> 2021; <b>7</b> (9):e31409. doi: 10.2196/31409                                                                                                                                                                                                                                                                                 | Not about misinformation                                                                                   |
| 36. | Li T, Hsu W, Lee ML, Chieu HL, editors. Probabilistic Decision Modeling in Social Networks. Proceedings - International Conference on Tools with Artificial Intelligence, ICTAI; 2020.                                                                                                                                                                                                                                                                                                      | Not about COVID-19 vaccines                                                                                |
| 37. | Lin YJ, Chou WJ, Chang YP, Yen CF. Denial of Justification for Vaccination: Its Multiple Related Variables and Impacts on Intention to Get Vaccinated against COVID-19. <i>Vaccines (Basel).</i> 2021; <b>9</b> (8):822. Published 2021 Jul 25. doi:10.3390/vaccines9080822                                                                                                                                                                                                                 | Not about social media or misinformation                                                                   |
| 38. | Liu S, Liu J. Public attitudes toward COVID-19 vaccines on English-language Twitter: A sentiment analysis. <i>Vaccine.</i> 2021; <b>39</b> (39):5499-5505. doi:10.1016/j.vaccine.2021.08.058                                                                                                                                                                                                                                                                                                | Not about misinformation                                                                                   |
| 39. | Luo S, Xin M, Wang S, et al. Behavioural intention of receiving COVID-19 vaccination, social media exposures and peer discussions in China. <i>Epidemiol Infect.</i> 2021; <b>149</b> :e158. Published 2021 Apr 23. doi:10.1017/S0950268821000947                                                                                                                                                                                                                                           | Not about misinformation                                                                                   |
| 40. | Marcec R, Likic R. Using Twitter for sentiment analysis towards AstraZeneca/Oxford, Pfizer/BioNTech and Moderna COVID-19 vaccines <i>Postgraduate Medical Journal.</i> Published Online First: 09 August 2021. doi: 10.1136/postgradmedj-2021-140685                                                                                                                                                                                                                                        | Not about misinformation                                                                                   |
| 41. | Marwah HK, Carlson K, Rosseau NA, Chretien KC, Kind T, Jackson HT. Videos, Views, and Vaccines: Evaluating the Quality of COVID-19 Communications on YouTube [published online ahead of print, 2021 Aug 31]. <i>Disaster Med Public Health Prep.</i> 2021;1-7. doi:10.1017/dmp.2021.284                                                                                                                                                                                                     | Too early in the COVID-19 vaccine development.<br><br>Study from January through June 2020                 |
| 42. | Melki J, Tamim H, Hadid D, Makki M, El Amine J, Hitti E. Mitigating infodemics: The relationship between news exposure and trust and belief in COVID-19 fake news and social media spreading. <i>PLoS ONE</i> 2021; <b>16</b> (6): e0252830. <a href="https://doi.org/10.1371/journal.pone.0252830">https://doi.org/10.1371/journal.pone.0252830</a>                                                                                                                                        | Too early in the COVID-19 vaccine development.<br><br>Study from March 27 and April 23, 2020.              |

|     |                                                                                                                                                                                                                                                                                                            |                                                                                                |
|-----|------------------------------------------------------------------------------------------------------------------------------------------------------------------------------------------------------------------------------------------------------------------------------------------------------------|------------------------------------------------------------------------------------------------|
| 43. | Michel-Kabamba N, Ngatu NR, Leon-Kabamba N, et al. Occupational COVID-19 Prevention among Congolese Healthcare Workers: Knowledge, Practices, PPE Compliance, and Safety Imperatives. <i>Trop Med Infect Dis</i> . 2020;6(1):6. Published 2020 Dec 30. doi:10.3390/tropicalmed6010006.                     | Not about COVID-19 vaccines or misinformation.                                                 |
| 44. | Mo PK, Luo S, Wang S, et al. Intention to Receive the COVID-19 Vaccination in China: Application of the Diffusion of Innovations Theory and the Moderating Role of Openness to Experience. <i>Vaccines (Basel)</i> . 2021;9(2):129. Published 2021 Feb 5. doi:10.3390/vaccines9020129.                     | Not about misinformation.                                                                      |
| 45. | Montalti M, Rallo F, Guaraldi F, et al. Would Parents Get Their Children Vaccinated Against SARS-CoV-2? Rate and Predictors of Vaccine Hesitancy According to a Survey over 5000 Families from Bologna, Italy. <i>Vaccines (Basel)</i> . 2021;9(4):366. Published 2021 Apr 10. doi:10.3390/vaccines9040366 | Not about misinformation                                                                       |
| 46. | Moore AC, Freeman-Daily J, Norris K, Bunn B, Baranski J, Chin C, et al. Collaborating to share evidence-based COVID-19 information across lung cancer patient advocacy groups. Clinical Cancer Research Conference: AACR Virtual Meeting: COVID. 2020;26(18 SUPPL).                                        | Not about COVID-19 vaccine or misinformation.                                                  |
| 47. | Motahari-Nezhad H, Shekofteh M, Andalib-Kondori M. Social media as a platform for information and support for coronavirus: analysis of COVID-19 Facebook groups. <i>Global Knowledge, Memory and Communication</i> . 2021.                                                                                 | Not about misinformation                                                                       |
| 48. | Nazar S, Pieters T. <i>Plandemic</i> Revisited: A Product of Planned Disinformation Amplifying the COVID-19 "infodemic". <i>Front Public Health</i> . 2021;9:649930. Published 2021 Jul 14. doi:10.3389/fpubh.2021.649930                                                                                  | Too early in the COVID-19 vaccine development.<br><br>Study from March 3rd to June 10th, 2020. |
| 49. | Nazlı ŞB, Yiğman F, Sevindik M, Deniz Özturan D. Psychological factors affecting COVID-19 vaccine hesitancy [published online ahead of print, 2021 May 14]. <i>Ir J Med Sci</i> . 2021;1-10. doi:10.1007/s11845-021-02640-0                                                                                | Not about misinformation                                                                       |
| 50. | Nomura S, Eguchi A, Yoneoka D, et al. Reasons for being unsure or unwilling regarding intention to take COVID-19 vaccine among Japanese people: A large cross-sectional national survey. <i>Lancet Reg Health West Pac</i> . 2021;14:100223. doi:10.1016/j.lanwpc.2021.100223                              | Not about misinformation                                                                       |
| 51. | Paul N, Gokhale SS, editors. Analysis and Classification of Vaccine Dialogue in the Coronavirus Era. Proceedings - 2020 IEEE International Conference on Big Data, Big Data 2020; 2020.                                                                                                                    | Not an empirical study                                                                         |
| 52. | Piltch-Loeb R, Savoia E, Goldberg B, Hughes B, Verhey T, Kayyem J, et al. (2021) Examining the effect of information channel on COVID-19 vaccine acceptance. <i>PLoS ONE</i> 16(5): e0251095. <a href="https://doi.org/10.1371/journal.pone.0251095">https://doi.org/10.1371/journal.pone.0251095</a>      | Not about misinformation.                                                                      |
| 53. | Platonov K, Svetlov K. Conspiracy Theories Dissemination on SNS Vkontakte: COVID-19 Case. <i>Commun Comput Inf Sci</i> 2020; 322-35.                                                                                                                                                                       | Too early in the COVID-19 vaccine development. Study from March 30 and May 12, 2020.           |
| 54. | Qamar M, Irfan O, Dhillon R A, et al. Acceptance of COVID-19 Vaccine in Pakistan: A Nationwide Cross-Sectional Study. <i>Cureus</i> 2021;13(7): e16603. doi:10.7759/cureus.16603.                                                                                                                          | Not about misinformation                                                                       |
| 55. | Reno C, Maietti E, Di Valerio Z, Montalti M, Fantini MP, Gori D. Vaccine Hesitancy towards COVID-19 Vaccination: Investigating the Role of Information Sources through a Mediation Analysis. <i>Infect Dis Rep</i> . 2021;13(3):712-723. Published 2021 Aug 12. doi:10.3390/idr13030066                    | Not about misinformation                                                                       |
| 56. | Rovetta A. The Impact of COVID-19 on Conspiracy Hypotheses and Risk Perception in Italy: Infodemiological Survey Study Using Google Trends. <i>JMIR Infodemiology</i> . 2021;1(1):e29929. Published 2021 Aug 6. doi:10.2196/29929                                                                          | Not about social media.<br><br>Removed during data extraction.                                 |
| 57. | Ruiz JB, Bell RA. Predictors of intention to vaccinate against COVID-19: Results of a nationwide survey. <i>Vaccine</i> . 2021;39(7):1080-1086. doi:10.1016/j.vaccine.2021.01.010                                                                                                                          | Removed during data extraction.<br><br>Study from June 2020.                                   |
| 58. | Sajjadi NB, Nowlin W, Nowlin R, et al. United States internet searches for "infertility" following COVID-19 vaccine misinformation. <i>Journal of Osteopathic Medicine</i> 2021;121(6):583-587. DOI: 10.1515/jom-2021-0059. PMID: 33838086.                                                                | Not about social media                                                                         |
| 59. | Sattar NS, Arifuzzaman S. Covid-19 vaccination awareness and aftermath: Public sentiment analysis on twitter data and vaccinated population prediction in the usa. <i>Appl Sci (Switzerland)</i> . 2021;11(13). <a href="https://doi.org/10.3390/app11136128">https://doi.org/10.3390/app11136128</a>      | Not about social media                                                                         |
| 60. | Scannell D, Desens L, Guadagno M, et al. COVID-19 Vaccine Discourse on Twitter: A Content Analysis of Persuasion                                                                                                                                                                                           | Not about COVID-19 vaccine.                                                                    |

|                                                                                                                                                                                                                                                                                                                                                 |                                                                                              |
|-------------------------------------------------------------------------------------------------------------------------------------------------------------------------------------------------------------------------------------------------------------------------------------------------------------------------------------------------|----------------------------------------------------------------------------------------------|
| Techniques, Sentiment and Mis/Disinformation. <i>J Health Commun</i> 2021; <b>26</b> :7, 443-459, DOI: <a href="https://doi.org/10.1080/10810730.2021.1955050">10.1080/10810730.2021.1955050</a>                                                                                                                                                |                                                                                              |
| 61. Sear RF, Velasquez N, Leahy R, et al. Quantifying COVID-19 Content in the Online Health Opinion War Using Machine Learning. <i>IEEE Access</i> . 2020; <b>8</b> :91886-91893. Published 2020 May 11. doi:10.1109/ACCESS.2020.2993967                                                                                                        | Not about COVID-19 vaccine.                                                                  |
| 62. Shahrezaye M, Meckel M, Steinacker L, Suter V. COVID-19's (Mis)Information Ecosystem on Twitter: How Partisanship Boosts the Spread of Conspiracy Narratives on German Speaking Twitter. <i>Advances in Intelligent Systems and Computing</i> 2021. p. 1060-73.                                                                             | Not about COVID-19 vaccine.                                                                  |
| 63. Soveri A, Karlsson LC, Antfolk J, Lindfelt M, Lewandowsky S. Unwillingness to engage in behaviors that protect against COVID-19: the role of conspiracy beliefs, trust, and endorsement of complementary and alternative medicine. <i>BMC Public Health</i> . 2021; <b>21</b> (1):684. Published 2021 Apr 8. doi:10.1186/s12889-021-10643-w | Too early in the COVID-19 vaccine development.<br><br>Study from 3rd and 17th of April 2020  |
| 64. Syed Alwi SAR, Rafidah E, Zurraini A, Juslina O, Brohi IB, Lukas S. A survey on COVID-19 vaccine acceptance and concern among Malaysians. <i>BMC Public Health</i> . 2021; <b>21</b> (1):1129. Published 2021 Jun 12. doi:10.1186/s12889-021-11071-6                                                                                        | Not about misinformation                                                                     |
| 65. Talukdar D, Stojkovski K, Suarez DB, Gupta MM. Role of Information Technology in COVID-19 Vaccination Drive: An Analysis of the COVID-19 Global Beliefs, Behaviors, and Norms Survey. <i>Cureus</i> . 2021; <b>13</b> (6):e15922. Published 2021 Jun 25. doi:10.7759/cureus.15922                                                           | Not about social media or misinformation.                                                    |
| 66. Tan HW, Lee CS, Goh DHL, Zheng H, Theng YL. Analyzing COVID-19 Vaccine Tweets for Tonal Shift. <i>23rd International Conference on Human-Computer Interaction, HCII 2021 ; 1421:615-623, 2021.</i>                                                                                                                                          | Not about misinformation.                                                                    |
| 67. Temsah MH, Barry M, Aljamaan F, et al. SARS-CoV-2 B.1.1.7 UK Variant of Concern Lineage-Related Perceptions, COVID-19 Vaccine Acceptance and Travel Worry Among Healthcare Workers. <i>Front Public Health</i> . 2021; <b>9</b> :686958. Published 2021 May 26. doi:10.3389/fpubh.2021.686958                                               | Not about misinformation.                                                                    |
| 68. To QG, To KG, Huynh VN, et al. Applying Machine Learning to Identify Anti-Vaccination Tweets during the COVID-19 Pandemic. <i>Int J Environ Res Public Health</i> . 2021; <b>18</b> (8):4069. Published 2021 Apr 12. doi:10.3390/ijerph18084069                                                                                             | Not about misinformation.                                                                    |
| 69. Viswanath K, Hiremath RN, Basra SS, Chourey N. Coronavirus disease 2019 vaccination drive: The perceptions and acceptance of vaccination among health care workers. <i>Asian Journal of Pharmaceutical and Clinical Research</i> . 2021; <b>14</b> (6):177-81.                                                                              | Not about social media or misinformation.                                                    |
| 70. Vojtek I, Palsenbarg V, Smyser J. 65. Vaccine Confidence, COVID19, and the Influence of Peer Networks. <i>Open Forum Infect Dis</i> . 2020; <b>7</b> (Suppl 1):S164. Published 2020 Dec 31. doi:10.1093/ofid/ofaa439.375                                                                                                                    | Not about misinformation.                                                                    |
| 71. Wang Z, She R, Chen X, et al. Parental acceptability of COVID-19 vaccination for children under the age of 18 years among Chinese doctors and nurses: a cross-sectional online survey. <i>Hum Vaccin Immunother</i> . 2021; <b>17</b> (10):3322-3332. doi:10.1080/21645515.2021.1917232                                                     | About a future COVID-19 vaccine.<br><br>Not about misinformation.                            |
| 72. Woko C, Siegel L, Hornik R. An Investigation of Low COVID-19 Vaccination Intentions among Black Americans: The Role of Behavioral Beliefs and Trust in COVID-19 Information Sources. <i>J Health Commun</i> . 2020; <b>25</b> (10):819-826. doi:10.1080/10810730.2020.1864521                                                               | Not about misinformation                                                                     |
| 73. Yu Y, Lau JTF, Lau MMC, Wong MCS, Chan PKS. Understanding the prevalence and associated factors of behavioral intention of COVID-19 vaccination under specific scenarios combining effectiveness, safety, and cost in the Hong Kong Chinese general population. <i>Int J Health Policy Manag</i> 2021. doi:10.34172/ijhpm.2021.02           | Not about misinformation.                                                                    |
| 74. Zeballos Rivas DR, Lopez Jaldin ML, Nina Canaviri B, Portugal Escalante LF, Alanes Fernández AMC, Aguilar Ticona JP. Social media exposure, risk perception, preventive behaviors and attitudes during the COVID-19 epidemic in La Paz, Bolivia: A cross sectional study. <i>PLoS One</i> 2021; <b>16</b> (1):e0245859.                     | Too early in the COVID-19 vaccine development.<br><br>Study from April 29th to May 9th 2020. |
| 75. Zhang S, Pian W, Ma F, Ni Z, Liu Y. Characterizing the COVID-19 Infodemic on Chinese Social Media: Exploratory Study. <i>JMIR Public Health Surveill</i> 2021; <b>7</b> (2):e26090.                                                                                                                                                         | Not about COVID-19 vaccine.                                                                  |
